# Supplementary material for: Transcriptome profiling of laser-captured germ cells and functional characterization of zbtb40 during 17alpha-methyltestosterone-induced spermatogenesis in orange-spotted grouper (Epinephelus coioides)
Source: BMC Genomics. 2020 Jan 23;21:73. doi: 10.1186/s12864-020-6477-4 (PMC6979330; doi:10.1186/s12864-020-6477-4)
Supplement: Supplementary file 2 — Additional file 2 : Table S1. The detailes of the top 20 KEGG enriched pathway. Table S2. The top 10 conserved sites among 14 species. [file 12864_2020_6477_MOESM2_ESM.xlsx]

## Sheet: Table S1
Table S1. The detailes of the top 20 KEGG enriched pathway
#	Pathway	out (1101)	All (8313)	Pvalue	Qvalue	Pathway ID
1	Osteoclast differentiation	39	150	1.8e-05	0.005416	ko04380
2	Chagas disease (American trypanosomiasis)	36	155	0.000436	0.065036	ko05142
3	Fatty acid degradation	16	54	0.001225	0.117458	ko00071
4	Choline metabolism in cancer	35	160	0.001623	0.117458	ko05231
5	T cell receptor signaling pathway	33	150	0.001971	0.117458	ko04660
6	Chronic myeloid leukemia	25	107	0.002856	0.130118	ko05220
7	HTLV-I infection	67	367	0.003323	0.130118	ko05166
8	Apoptosis	26	115	0.003842	0.130118	ko04210
9	Glycerolipid metabolism	20	82	0.004316	0.130118	ko00561
10	Protein processing in endoplasmic reticulum	44	225	0.004545	0.130118	ko04141
11	Notch signaling pathway	16	61	0.004803	0.130118	ko04330
12	RIG-I-like receptor signaling pathway	16	66	0.010712	0.242823	ko04622
13	MAPK signaling pathway	68	393	0.011062	0.242823	ko04010
14	Neurotrophin signaling pathway	35	181	0.012589	0.242823	ko04722
15	Glycolysis / Gluconeogenesis	21	96	0.012878	0.242823	ko00010
16	Retinol metabolism	11	41	0.015102	0.242823	ko00830
17	Epithelial cell signaling in Helicobacter pylori infection	22	104	0.016254	0.242823	ko05120
18	FoxO signaling pathway	37	198	0.017748	0.242823	ko04068
19	TGF-beta signaling pathway	24	117	0.017933	0.242823	ko04350
20	Fatty acid metabolism	15	64	0.017957	0.242823	ko01212

## Sheet: Table S2
Table S2. The top 10 conserved sites among 14 species
Motif	Motif Site	E-value	Wideth
1		2.5e-227	50
2		8.9e-208	50
3		2.4e-200	50
4		8.5e-199	50
5		8.6e-197	50
6		2.4e-191	50
7		8.3e-191	50
8		4.2e-186	50
9		8.1e-182	50
10		4.6e-179	50
